# Supplementary material for: Tailoring the energy gap to promote long wavelength emission of nitrogen-doped sulfur quantum dots via dual functional ethylenediamine
Source: Royal Society of Chemistry journal article supplement (doi:10.1039/d4tc00155a), 2024-01-01
Supplement: d4tc00155a1.pdf [file d4tc00155a1.pdf]

## Supporting information

### **Tailoring the energy gap to promote long wavelength emission of nitrogen-doped sulfur quantum dots via dual functional ethylenediamine**

Guoyong Huang <sup>a,#</sup>, Zitong Wei <sup>a,#</sup>, Xiaona Zhang <sup>a</sup>, Wenyi Lu <sup>a,b</sup>, Yizhang Du <sup>a</sup>, Yali Yin <sup>a</sup>, Umme Hani Prova <sup>a</sup>, Chunxia Wang <sup>a,\*</sup>

<sup>a</sup> State Key Laboratory of Heavy Oil Processing, College of New Energy and Materials, China University of Petroleum (Beijing), Beijing 102249, China

<sup>b</sup> Department of Materials Science, Fudan University, Shanghai 200433, China

# These two authors contribute equally.

\*Corresponding author: E-mail: cxwang@iccas.ac.cn.

## 2.1 Chemicals and Reagents

Sulfur powders were provided by Tianjin Fuchen. Ethylenediamine (EDA) was from Beijing Chemical Works. Ethanol (EtOH) (99%), NaOH and HCl were purchased from Tianjin Guangfu Technology Development Co., Ltd., Dimethyl sulfoxide (DMSO), N,N-dimethylformamide (DMF) and acetone were all obtained from Sigma-Aldrich (Shanghai, China). Distilled water used with an electrical resistance of  $18.2 \text{ M}\Omega \cdot \text{cm}^{-1}$ . All the chemicals were used without further purification.

## 2.2 Synthesis of N-SQDs

First, 40 mg of sublimated sulfur powder was added to 10 mL ethylenediamine (EDA) and sonicated for 5 min to form a dark brown solution. Subsequently, the dark brown solution was reacted at  $180 \text{ }^\circ\text{C}$  for 15 h in poly tetrafluoroethylene (Teflon)-lined autoclave (25 mL). Finally, the solution was filtered to remove unreacted material via  $0.22 \text{ }\mu\text{m}$  microporous filtering film, then excess reaction solvent EDA was removed by rotary evaporation to yield N-SQDs-15 and stored at  $4 \text{ }^\circ\text{C}$ . Fixing the reaction time as 5 h, 10 h, and 20 h give a final product of N-SQDs-5, N-SQDs-10 and N-SQDs-20, respectively.

## 2.3 Instruments and Characterizations

The morphology of the prepared N-SQDs was investigated by transmission electron microscopy (FEI, USA). X-ray photoelectron spectroscopy (XPS) spectra were conducted on ESCALab220I-XL. Fourier transform infrared spectroscopy (FT-IR) measurements were carried out on a PerkinElmer Frontier IR/FIR, US. The optical properties were performed with a fluorescence spectrophotometer (F-7000, Hitachi,

Japan) to record fluorescence spectra and a UV-2600 spectrophotometer (Shimadzu, Japan) to monitor UV-vis absorption spectra. The absolute QY of SQDs was estimated by using fluorescence spectrometer FLS-980 (Edinburgh, England).

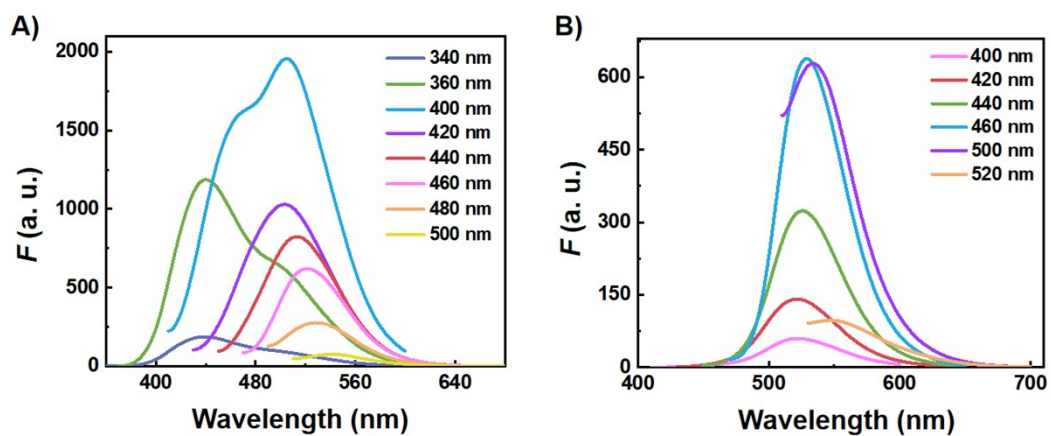

**Figure S1.** PL spectra of N-SQDs obtained from the reaction using different amount of sulfur powders. (A) 20 mg sulfur powders; (B) 60 mg sulfur powders. Other condition: 10 mL EDA, temperature: 180 °C.

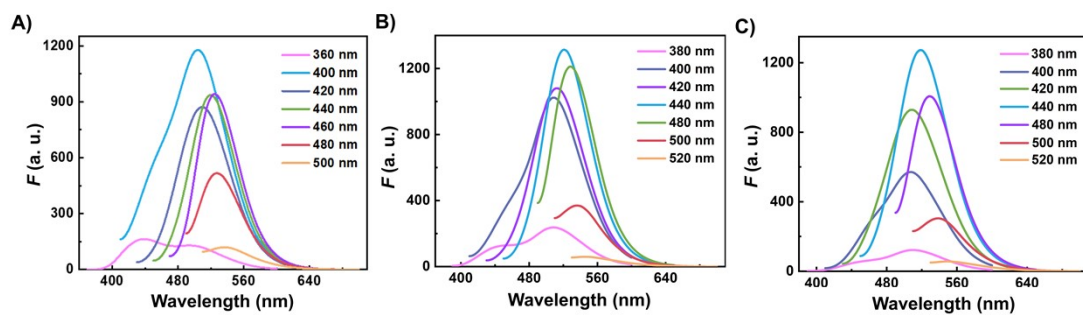

**Figure S2.** PL spectra of N-SQDs obtained from the reaction different reaction time. (A) 5 h; (B) 10 h; (C) 20 h. Other conditions: 40 mg sulfur powders and 10 mL EDA, temperature: 180 °C.

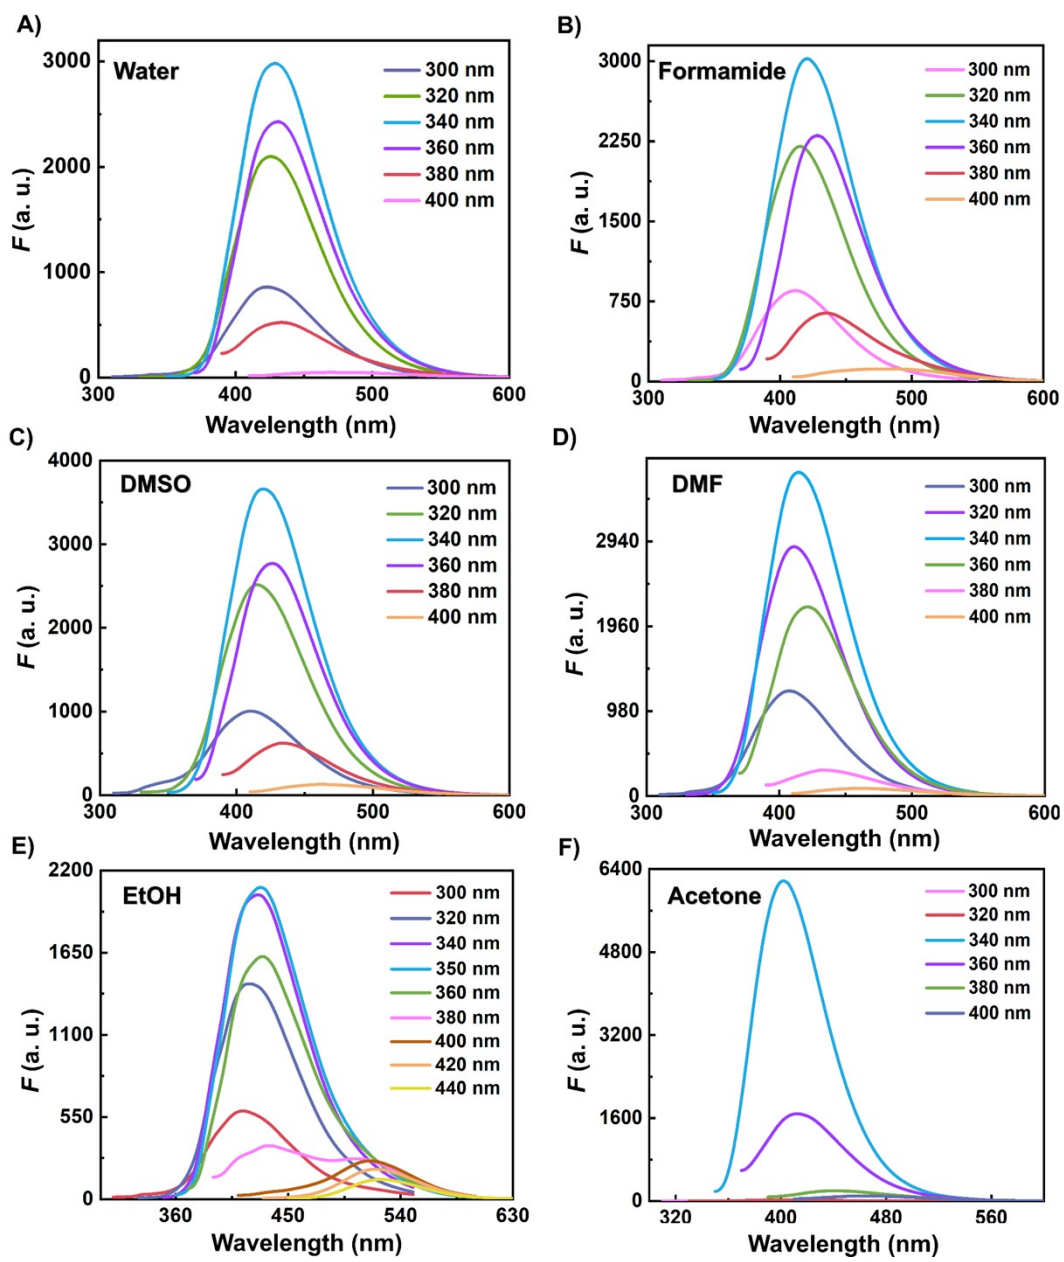

**Figure S3.** PL spectra of N-SQDs-15 under different excitations (0.4mg/ml) in various solvents (A)-(F).

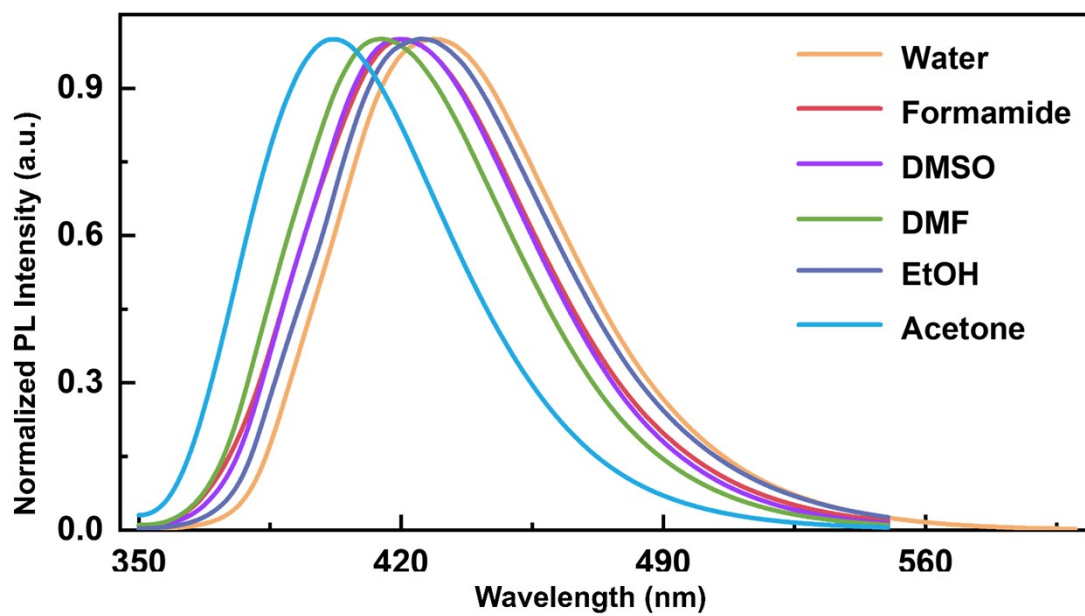

**Figure S4.** Normalized PL spectra of N-SQDs-15 in various solvents under excitation of 340 nm.

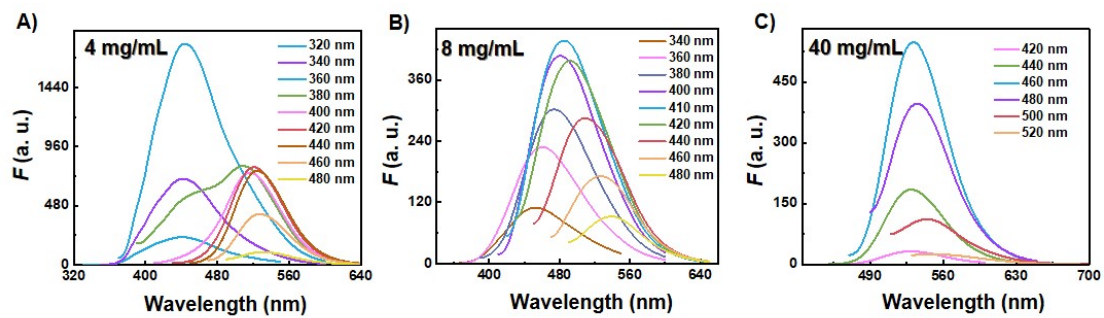

**Figure S5.** PL spectra of various concentrations of N-SQDs-15 with under different excitation.



The equation about a possible reaction mechanism for the synthesis of N-SQDs using EDA as solvent and nitrogen source are shown below.

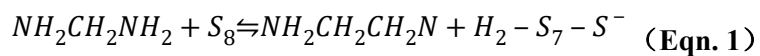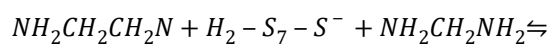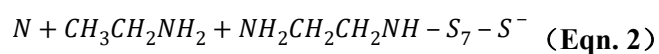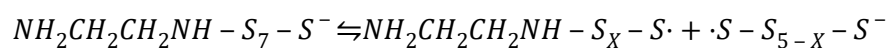

(Eqn. 3)

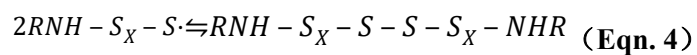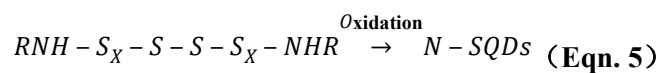

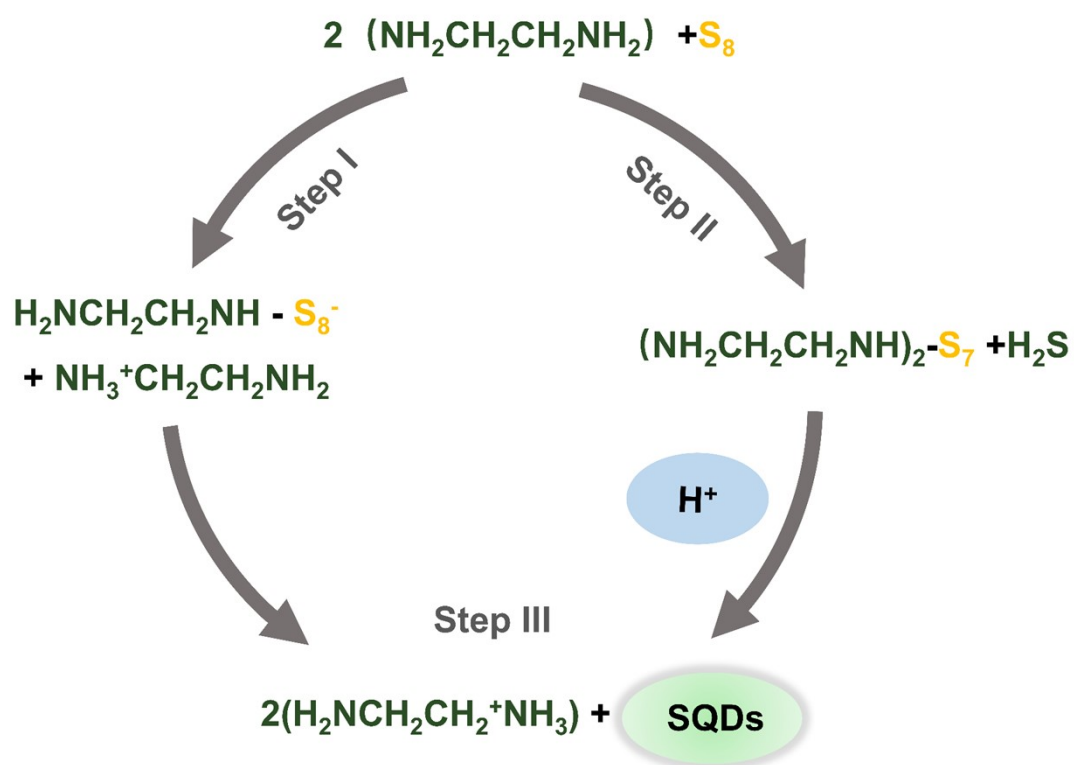

**Figure S6.** Other mechanism diagram of SQDs.
